# Supplementary material for: Information Overload, Wellbeing and COVID-19: A Survey in China
Source: MDPI journal article supplement (doi:10.3390/bs11050062), 2021-04-27
Supplement: s1 [file s1]

## Supplementary Material

### 1. The Questionnaire

#### COVID19 Wellbeing Questionnaire (English Version)

1. Signed Informed Consent form

2. Gender

Male

Female

3. Age

Under 18

18~25

26~30

31~40

41~50

51~60

Over 60

4. Current Location

\_\_\_\_\_(Province) \_\_\_\_\_(City)

5. Job

Student

Teacher

Medical and Nursing Staffs

Civil Servant

Office Worker

Factory Worker

Company Manager or Administer

Military Men or Policemen

Farmer

Freelancers

Self-employed

Retired

Unemployed

Other

6. Relationship status

Single

Married, none child

Married, one child or more

Divorced

Windowed

7. Role in COVID19 outbreak

Normal Public

Suspected Patient  
Confirmed Patient  
Recovered Patient  
Close Contact with Confirmed case  
Patient's family  
Frontline Medical and Nursing Staffs  
Other Frontline Workers (e.g., police officer, civil servant, volunteer)

8. Do you have family, friends, neighbours, or yourself were infected the COVID19?

I was infected

Family member was infected

Friend(s) or friend's family member was infected

Neighbours were infected (i.e., confirmed cases nearby the place you current live)

Myself, my family, friend or neighbours was suspected but not been infected

Myself, my family, friend or neighbours was close contact but not been infected

None

-----  
Coping type and personality (WPQ - Williams, Pendlebury, and Smith, 2017)

9. (Positive Coping) When I find myself in stressful situations I try to deal with it in a pro-active way (For example: by taking one step at a time, by changing something so that it would work out, by learning from the situation, by asking someone for help)

Disagree strongly 1 2 3 4 5 6 7 8 9 10 Agree strongly

10. (Negative Coping) When I find myself in stressful situations I tend to look inwardly (For example: I blame myself for the situation, wish that I had the power to change what has happened, wish the situation would go away, try to forget the whole thing)

Disagree strongly 1 2 3 4 5 6 7 8 9 10 Agree strongly

11. (Optimism) In general, I feel optimistic about the future (For example: I usually expect the best, I expect more good things to happen to me than bad, It's easy for me to relax)

Disagree strongly 1 2 3 4 5 6 7 8 9 10 Agree strongly

12. (Self-efficacy) I am confident in my ability to solve problems that I might face in life (For example: I can usually handle whatever comes my way, If I try hard enough I can overcome difficult problems, I can stick to my aims and accomplish my goals)

Disagree strongly 1 2 3 4 5 6 7 8 9 10 Agree strongly

13. (Self esteem) Overall, I feel that I have positive self-esteem (For example: On the whole I am satisfied with myself, I am able to do things as well as most other people, I feel that I am a person of worth)

Disagree strongly 1 2 3 4 5 6 7 8 9 10 Agree strongly

-----  
14. To what extent did you pay attention to the COVID19 epidemic?  
Not at all 1 2 3 4 5 Very much

15. In the last two weeks, the average hour per day you spend on getting the COVID19 information, through the following options?

QQ (WhatsApp, Facebook, Messages, etc)

0 0.5 1 1.5 2 3 4 5 6 7 or more

WeChat (WhatsApp, Facebook, Messages, etc)

0 0.5 1 1.5 2 3 4 5 6 7 or more

Weibo (Twitter, etc)

0 0.5 1 1.5 2 3 4 5 6 7 or more

Other Social Media

0 0.5 1 1.5 2 3 4 5 6 7 or more

Video APPs (Tik Tok, Bilibili, Youtube, etc)

0 0.5 1 1.5 2 3 4 5 6 7 or more

Mobile News Apps

0 0.5 1 1.5 2 3 4 5 6 7 or more

Knowledge Sharing Website (Zhihu, Quora, etc)

0 0.5 1 1.5 2 3 4 5 6 7 or more

TV

0 0.5 1 1.5 2 3 4 5 6 7 or more

Broadcasting and newspaper

0 0.5 1 1.5 2 3 4 5 6 7 or more

Other

0 0.5 1 1.5 2 3 4 5 6 7 or more

16. Before COVID19 outbreaks, the average hour per day you spend on media (e.g., social media, media APPs, TV, broadcasting, newspaper) was?

Less than 30mins

Around 1 hour

Around 2 hours

Around 3 hours

Around 4 hours

Around 5 hours

Around 6 hours

Around 7 hours

Around 8 hours

Around 9 hours

Around 10 hours

More than 10 hours

17. Overall, to what extent you feel panic due to the COVID19 outbreaks?

Not at all 1 2 3 4 5 6 7 8 9 10 Very much so

-----

Perceived Information Overload (Misra and Stokols, 2011)

18. In the last two weeks, how often have you felt overwhelmed with the COVID19 updates you received?

0 – Never

1 – Almost never

- 2 – Sometimes
- 3 – Fairly often
- 4 – Very often

19. In the last two weeks, how often have you forgotten to respond to important messages, text or email?

- 0 – Never
- 1 – Almost never
- 2 – Sometimes
- 3 – Fairly often
- 4 – Very often

20. In the last two weeks, how often have you felt pressured to respond to messages, text or email quickly? (e.g., report your current location and health status)

- 0 – Never
- 1 – Almost never
- 2 – Sometimes
- 3 – Fairly often
- 4 – Very often

21. In the last two weeks, how often have you received more information, updates, cases stories about COVID19 than you can handle?

- 0 – Never
- 1 – Almost never
- 2 – Sometimes
- 3 – Fairly often
- 4 – Very often

22. In the last two weeks, how often have you felt that you spend too much time on paying attention on COVID19?

- 0 – Never
- 1 – Almost never
- 2 – Sometimes
- 3 – Fairly often
- 4 – Very often

23. In the last two weeks, how often have you felt pressured to manage several information and communication inputs about COVID19 at the same time?

0 – Never

1 – Almost never

2 – Sometimes

3 – Fairly often

4 – Very often

24. In the last two weeks, how often have you felt that you received too many COVID19 updated (e.g., news, applications pop-up, event notifications, personal messages, and status updates) to deal with?

0 – Never

1 – Almost never

2 – Sometimes

3 – Fairly often

4 – Very often

25. In the last two weeks, how often have you felt that you have receive more instant messages about COVID19 that you can handle?

0 – Never

1 – Almost never

2 – Sometimes

3 – Fairly often

4 – Very often

26. In the last two weeks, how often have you felt that your focusing on COVID19 leave you too little for recreational activities?

0 – Never

1 – Almost never

2 – Sometimes

3 – Fairly often

4 – Very often

27. In the last two weeks, how often have you felt that your focusing on COVID19 information makes you less sensitive to the needs of others (e.g., eat or sleep)?

- 0 – Never
- 1 – Almost never
- 2 – Sometimes
- 3 – Fairly often
- 4 – Very often

28. In the last month, how often have you felt hassled by have to stay at home, or have to go out (e.g., for purchase or work)?

- 0 – Never
- 1 – Almost never
- 2 – Sometimes
- 3 – Fairly often
- 4 – Very often

29. In the last two weeks, how often have you felt that the extra demands on you due to COVID19 exceed your capacity to deal with them? (e.g., looking for masks and disinfection supplies, doing disinfection cleaning, extra work task, overtime work)

- 0 – Never
- 1 – Almost never
- 2 – Sometimes
- 3 – Fairly often
- 4 – Very often

30. In the last two weeks, how often have you felt that the environment surrounding you is too noisy?

- 0 – Never
- 1 – Almost never
- 2 – Sometimes
- 3 – Fairly often
- 4 – Very often

31. In the last two weeks, how often have you received the updated information about masks and disinfection supplies restocking?

- 0 – Never
- 1 – Almost never

- 2 – Sometimes
- 3 – Fairly often
- 4 – Very often

32. In the last two weeks, how often have you suffered setbacks on buying masks or disinfection supplies? (for example, out of stock, order cancelled, fake, etc.) \*

- 0 – Never
- 1 – Almost never
- 2 – Sometimes
- 3 – Fairly often
- 4 – Very often

33. In the last two weeks, how often have you felt that you wanted to escape from network and media to reduce your attention on COVID19?

- 0 – Never
- 1 – Almost never
- 2 – Sometimes
- 3 – Fairly often
- 4 – Very often

-----

Outcomes (WPQ - Williams, Pendlebury, and Smith, 2017)

34. (Positive affect) Facing COVID19 information and updated, in general, I mostly experience positive feelings (For example: I feel alert, inspired, determined, attentive)

Disagree strongly 1 2 3 4 5 6 7 8 9 10 Agree strongly

35. (Negative affect) Facing COVID19 information and updated, in general, I mostly experience negative feelings (For example: I feel upset, hostile, ashamed, nervous)

Disagree strongly 1 2 3 4 5 6 7 8 9 10 Agree strongly

36. (Life Satisfaction) Overall, I feel that I am satisfied with my life during COVID19 outbreaks (For example: In most ways my life is close to my ideal, so far I have gotten the important things I want)

Disagree strongly 1 2 3 4 5 6 7 8 9 10 Agree strongly

37. (Depression) On a scale of one to ten, how depressed would you say you are in general due to COVID19? (e.g. feeling 'down', no longer looking forward to things or enjoying things that you

used to)

Disagree strongly 1 2 3 4 5 6 7 8 9 10 Agree strongly

38. (Anxiety) On a scale of one to ten, how anxious would you say you are in general due to COVID19? (e.g. feeling tense or 'wound up', unable to relax, feelings of worry or panic)?

Disagree strongly 1 2 3 4 5 6 7 8 9 10 Agree strongly

39. (Stress) In general, how stressed did you find the COVID19 outbreak made you?

Disagree strongly 1 2 3 4 5 6 7 8 9 10 Agree strongly

40. Currently, how will you rate your overall mental health during the COVID19 outbreaks happened?

Not healthy 1 2 3 4 5 6 7 8 9 10 Extremely healthy



**Location of respondents: City**

|                  | Frequency | Percent | Valid Percent | Cumulative Percent |
|------------------|-----------|---------|---------------|--------------------|
| Bangkok          | 1         | .1      | .1            | 31.4               |
| Beijing          | 56        | 4.5     | 4.5           | 35.9               |
| Bengbu           | 1         | .1      | .1            | 36.0               |
| Changsha         | 9         | .7      | .7            | 36.7               |
| Chongqing        | 11        | .9      | .9            | 37.6               |
| Fuyang           | 3         | .2      | .2            | 37.8               |
| Guangdong Cities | 111       | 9.0     | 9.0           | 46.8               |
| Guangzhou        | 72        | 5.8     | 5.8           | 52.6               |
| Haerbing         | 2         | .2      | .2            | 52.7               |
| Hangzhou         | 38        | 3.1     | 3.1           | 55.8               |
| HangZhou         | 1         | .1      | .1            | 55.9               |
| Hefei            | 7         | .6      | .6            | 56.5               |
| Hubei Cities     | 90        | 7.3     | 7.3           | 63.7               |
| Islamabad        | 1         | .1      | .1            | 63.8               |
| Lower Hutt       | 2         | .2      | .2            | 64.0               |
| Nanchang         | 1         | .1      | .1            | 64.0               |
| Ningbo           | 8         | .6      | .6            | 65.0               |
| Shanghai         | 61        | 4.9     | 4.9           | 70.0               |
| Shenzhen         | 303       | 24.4    | 24.4          | 94.4               |
| Wenzhou          | 13        | 1.0     | 1.0           | 95.9               |
| Wuhan            | 38        | 3.1     | 3.1           | 99.0               |
| Xi' an           | 1         | .1      | .1            | 99.0               |
| Xinyang          | 1         | .1      | .1            | 99.1               |
| Zhejiang cities  | 11        | .9      | .9            | 100.0              |
| Total            | 1240      | 100.0   | 100.0         |                    |

|       |              | Province  |         |               |                    |
|-------|--------------|-----------|---------|---------------|--------------------|
|       |              | Frequency | Percent | Valid Percent | Cumulative Percent |
| Valid | Anhui        | 19        | 1.5     | 1.5           | 1.5                |
|       | Beijing      | 56        | 4.5     | 4.5           | 6.0                |
|       | Chongqing    | 11        | .9      | .9            | 6.9                |
|       | Fujian       | 97        | 7.8     | 7.8           | 14.8               |
|       | Gansu        | 7         | .6      | .6            | 15.3               |
|       | Guangdong    | 486       | 39.2    | 39.2          | 54.5               |
|       | Guangxi      | 11        | .9      | .9            | 55.4               |
|       | Guizhou      | 2         | .2      | .2            | 55.6               |
|       | Hainan       | 6         | .5      | .5            | 56.0               |
|       | Hebei        | 12        | 1.0     | 1.0           | 57.0               |
|       | Heilongjiang | 7         | .6      | .6            | 57.6               |
|       | Henan        | 20        | 1.6     | 1.6           | 59.2               |
|       | Hongkong     | 5         | .4      | .4            | 59.6               |
|       | Hubei        | 128       | 10.3    | 10.3          | 69.9               |
|       | Hunan        | 23        | 1.9     | 1.9           | 71.8               |
|       | Jiangsu      | 48        | 3.9     | 3.9           | 75.6               |
|       | Jiangxi      | 17        | 1.4     | 1.4           | 77.0               |
|       | Jilin        | 1         | .1      | .1            | 77.1               |
|       | Liaoning     | 9         | .7      | .7            | 77.8               |
|       | Neimenggu    | 5         | .4      | .4            | 78.2               |
|       | Ningxia      | 3         | .2      | .2            | 78.5               |
|       | Qinghai      | 1         | .1      | .1            | 82.7               |
|       | Shandong     | 24        | 1.9     | 1.9           | 84.7               |

|  |          |      |       |       |       |
|--|----------|------|-------|-------|-------|
|  | Shanghai | 61   | 4.9   | 4.9   | 89.6  |
|  | Shanxi   | 15   | 1.2   | 1.2   | 90.8  |
|  | Shanxi2  | 15   | 1.2   | 1.2   | 92.0  |
|  | Sichuan  | 13   | 1.0   | 1.0   | 93.1  |
|  | Taiwan   | 1    | .1    | .1    | 93.1  |
|  | Tianjing | 8    | .6    | .6    | 93.8  |
|  | Xinjiang | 3    | .2    | .2    | 94.0  |
|  | Yunnan   | 3    | .2    | .2    | 94.3  |
|  | Zhejiang | 71   | 5.7   | 5.7   | 100.0 |
|  | Total    | 1240 | 100.0 | 100.0 |       |

| Location Risk |                         |           |         |               |                    |
|---------------|-------------------------|-----------|---------|---------------|--------------------|
|               |                         | Frequency | Percent | Valid Percent | Cumulative Percent |
| Valid         | Wuhan, Hubei            | 38        | 3.1     | 3.1           | 3.1                |
|               | Other cities in Hubei   | 90        | 7.3     | 7.3           | 10.3               |
|               | Cities with 300+ cases  | 516       | 41.6    | 41.6          | 51.9               |
|               | Cities with 100+ cases  | 72        | 5.8     | 5.8           | 57.7               |
|               | Cities near 300+ cities | 122       | 9.8     | 9.8           | 67.6               |
|               | Cities near 100+ cities | 63        | 5.1     | 5.1           | 72.7               |
|               | Other cities            | 287       | 23.1    | 23.1          | 95.8               |
|               | Total                   | 1240      | 100.0   | 100.0         |                    |

## 新型冠状病毒肺炎疫情下心理负荷及应对措施调查

您好！近日，新型肺炎疫情牵动着全国人民的心，每天坏消息层出不穷，给人们的心理造成了严重的影响。对此，深圳大学心理学院发起本次调查，旨在了解人们通过网络获取肺炎疫情相关信息时的心理和行为反应，以便为心理健康干预提供科学依据。本问卷采用匿名调查的形式，严格遵守保密原则，答案无对错之分，数据仅作科学研究之用。若您想知道调查的结果或愿意参与后续的追踪调研，您可选择在问卷最后留下您的联系方式。

本次问卷调查大约需时10分钟，您回答的真实性和完整性对我们后续心理干预策略的探究非常重要。非常感谢您的支持与参与！

本研究已通过深圳大学医学院伦理审查（ID: 2020007）如果您对此问卷有任何疑问，欢迎联系范老师（FanJL@szu.edu.cn）。

我已阅读并同意参与此研究 [单选题] \*

- ☐是，同意参与
- ☐否，不同意参与

个人基本情况

您的性别： [单选题] \*

- ☐男
- ☐女

您的年龄段： [单选题] \*

- ☐18岁以下
- ☐18~25
- ☐26~30
- ☐31~40
- ☐41~50
- ☐51~60
- ☐60以上

您目前所在地：[填空题] \*

---

您目前从事的职业：[单选题] \*

- ☐ 学生
- ☐ 教师
- ☐ 医护人员
- ☐ 公务员
- ☐ 普通职员（办公室、写字楼工作人员、白领）
- ☐ 普通工人（工厂、体力劳动）
- ☐ 企业管理人员（含基层、中高层）
- ☐ 现役军人或警察
- ☐ 农民（农林牧渔等）
- ☐ 自由职业者
- ☐ 个体经营者
- ☐ 离退休人员
- ☐ 无业人员
- ☐ 其他

您的婚姻状况：[单选题] \*

- ☐ 未婚
- ☐ 已婚无孩
- ☐ 已婚有孩
- ☐ 离异
- ☐ 丧偶

您在此次疫情中的身份：[单选题] \*

- ☐普通民众
- ☐疑似患者
- ☐确诊患者
- ☐治愈康复者
- ☐密切接触者
- ☐患者家属
- ☐一线医护人员
- ☐其他一线人员（如警察、公务员、志愿者等）

您的亲朋邻里是否有被感染新型冠状病毒？ [单选题] \*

- ☐自己被感染
- ☐亲人被感染
- ☐朋友或朋友亲属被感染
- ☐邻居被感染（即您住宅附近有感染疑似或确诊病例）
- ☐有疑似病例但未感染
- ☐有密切接触但未被感染
- ☐均未被感染

以下是对您个性的描述，0是该描述非常不符合您的实际情况，10是非常符合。

1. 总的来说，我对未来感到乐观。 [单选题] \*

- |                             |                          |                          |                          |                          |                          |                          |                          |                          |                          |                            |
|-----------------------------|--------------------------|--------------------------|--------------------------|--------------------------|--------------------------|--------------------------|--------------------------|--------------------------|--------------------------|----------------------------|
| <input type="radio"/> 完全不乐观 | <input type="radio"/> 01 | <input type="radio"/> 02 | <input type="radio"/> 03 | <input type="radio"/> 04 | <input type="radio"/> 05 | <input type="radio"/> 06 | <input type="radio"/> 07 | <input type="radio"/> 08 | <input type="radio"/> 09 | <input type="radio"/> 极其乐观 |
|-----------------------------|--------------------------|--------------------------|--------------------------|--------------------------|--------------------------|--------------------------|--------------------------|--------------------------|--------------------------|----------------------------|

2. 我有信心可以解决生活中可能出现的问题。 [单选题] \*

- |                             |                          |                          |                          |                          |                          |                          |                          |                          |                          |                             |
|-----------------------------|--------------------------|--------------------------|--------------------------|--------------------------|--------------------------|--------------------------|--------------------------|--------------------------|--------------------------|-----------------------------|
| <input type="radio"/> 完全没信心 | <input type="radio"/> 01 | <input type="radio"/> 02 | <input type="radio"/> 03 | <input type="radio"/> 04 | <input type="radio"/> 05 | <input type="radio"/> 06 | <input type="radio"/> 07 | <input type="radio"/> 08 | <input type="radio"/> 09 | <input type="radio"/> 极其有信心 |
|-----------------------------|--------------------------|--------------------------|--------------------------|--------------------------|--------------------------|--------------------------|--------------------------|--------------------------|--------------------------|-----------------------------|

3. 总的来说，我是有自尊有自信的人（如，对自己感到满意，觉得自己能跟多数人一样把事情办好，觉得自己很有价值）。[单选题] \*

o 完全不是    o1    o2    o3    o4    o5    o6    o7    o8    o9    o 极其如此

4. 我认为自己很外向（如，我很健谈，遇事可以泰然自若，对社交场合有自信）。[单选题] \*

o 完全不外向    o1    o2    o3    o4    o5    o6    o7    o8    o9    o 极其外向

5. 我觉得自己很有亲和力（如，对需要帮助的人有同情心，我喜欢对他人友好，善于合作）。[单选题] \*

o 完全不亲和    o1    o2    o3    o4    o5    o6    o7    o8    o9    o 极其亲和

6. 我觉得我是一个有责任心的人（如，准备充分，善于制定计划并执行，我注重细节）。[单选题] \*

o 完全没有责任心    o1    o2    o3    o4    o5    o6    o7    o8    o9    o 极其有责任心

7. 我觉得我可以跟别人相处融洽（我在他人面前很放松，从不嫉妒别人，我没有偏见、能完全接纳和尊重与自己截然不同的人——包括社会上的小众群体）。[单选题] \*

o 完全不是    o1    o2    o3    o4    o5    o6    o7    o8    o9    o 极其如此

## 第一部分

下面是关于您对新型冠状病毒肺炎疫情的**关注度**的一些题目，请您根据自身情况，如实作答。





|                       |                       |                       |                       |                       |                       |                       |                       |                       |                       |                       |
|-----------------------|-----------------------|-----------------------|-----------------------|-----------------------|-----------------------|-----------------------|-----------------------|-----------------------|-----------------------|-----------------------|
| 手机新闻客户端（<br>网易、今日头条等） | <input type="radio"/> |
| 网络平台（<br>知乎、豆瓣等）      | <input type="radio"/> |
| 传统媒体                  |                       |                       |                       |                       |                       |                       |                       |                       |                       |                       |
| 电视                    | <input type="radio"/> |
| 广播和报纸                 | <input type="radio"/> |
| 其他                    | <input type="radio"/> |

肺炎疫情爆发之前，您平均每天使用媒体（手机、电视、广播）的时间是？ [单选题] \*

- ☐小于30分钟
- ☐1小时左右
- ☐2小时左右
- ☐3小时左右
- ☐4小时左右
- ☐5小时左右
- ☐6小时左右
- ☐7小时左右

- ☐8小时左右
- ☐9小时左右
- ☐10小时左右
- ☐10小时以上

整体而言，肺炎疫情给您造成的恐慌或焦虑程度如何？ [单选题] \*

- |                                 |                         |                         |                         |                         |                         |                         |                         |                         |                         |                               |
|---------------------------------|-------------------------|-------------------------|-------------------------|-------------------------|-------------------------|-------------------------|-------------------------|-------------------------|-------------------------|-------------------------------|
| <input type="radio"/> 完全不恐慌、不焦虑 | <input type="radio"/> 1 | <input type="radio"/> 2 | <input type="radio"/> 3 | <input type="radio"/> 4 | <input type="radio"/> 5 | <input type="radio"/> 6 | <input type="radio"/> 7 | <input type="radio"/> 8 | <input type="radio"/> 9 | <input type="radio"/> 非常恐慌、焦虑 |
|---------------------------------|-------------------------|-------------------------|-------------------------|-------------------------|-------------------------|-------------------------|-------------------------|-------------------------|-------------------------|-------------------------------|

最近两周，您有多少次对您看到的疫情相关信息，感到不知所措？ [单选题] \*

- |                            |                           |                          |                           |                            |
|----------------------------|---------------------------|--------------------------|---------------------------|----------------------------|
| <input type="radio"/> 完全没有 | <input type="radio"/> 偶尔会 | <input type="radio"/> 一般 | <input type="radio"/> 经常会 | <input type="radio"/> 一直如此 |
|----------------------------|---------------------------|--------------------------|---------------------------|----------------------------|

最近两周，您有多少次忘记回复重要的微信、短信或邮件？ [单选题] \*

- |                            |                           |                          |                           |                            |
|----------------------------|---------------------------|--------------------------|---------------------------|----------------------------|
| <input type="radio"/> 完全没有 | <input type="radio"/> 偶尔会 | <input type="radio"/> 一般 | <input type="radio"/> 经常会 | <input type="radio"/> 一直如此 |
|----------------------------|---------------------------|--------------------------|---------------------------|----------------------------|

最近两周，您有多少次对必须回复微信、短信而感到有压力？（如，报备行踪和健康状况） [单选题] \*

- |                            |                           |                          |                           |                            |
|----------------------------|---------------------------|--------------------------|---------------------------|----------------------------|
| <input type="radio"/> 完全没有 | <input type="radio"/> 偶尔会 | <input type="radio"/> 一般 | <input type="radio"/> 经常会 | <input type="radio"/> 一直如此 |
|----------------------------|---------------------------|--------------------------|---------------------------|----------------------------|

最近两周，您有多少次曾感到你了解到的疫情资讯、相关公告、分析性文章或社会动态，超出了您能理解或承受的范围？ [单选题] \*

- |                            |                           |                          |                           |                            |
|----------------------------|---------------------------|--------------------------|---------------------------|----------------------------|
| <input type="radio"/> 完全没有 | <input type="radio"/> 偶尔会 | <input type="radio"/> 一般 | <input type="radio"/> 经常会 | <input type="radio"/> 一直如此 |
|----------------------------|---------------------------|--------------------------|---------------------------|----------------------------|

最近两周，您有多少次觉得自己在关注疫情资讯上花费了过多的时间？ [单选题] \*

☐完全没有      ☐偶尔会      ☐一般      ☐经常会      ☐一直如此

最近两周，您有多少次对不得不同时处理各种疫情资讯 和 即时通讯信息，而感到有压力？ [单选题] \*

☐完全没有      ☐偶尔会      ☐一般      ☐经常会      ☐一直如此

最近两周，您有多少次感到您接收了太多的疫情相关的推送（如新闻、APP推送、热搜、私人讯息、他人的朋友圈或QQ空间状态更新等）？ [单选题] \*

☐完全没有      ☐偶尔会      ☐一般      ☐经常会      ☐一直如此

最近两周，您有多少次感到您收到过多的关于疫情等即时通讯信息（如微信、QQ、群聊、短信等），超出了您能从容处理的范围？（如，不得不花费大量时间来理解、分析判断这些消息） [单选题] \*

☐完全没有      ☐偶尔会      ☐一般      ☐经常会      ☐一直如此

最近两周，您有多少次感到关注疫情导致您的娱乐活动时间被压缩减少？ [单选题] \*

☐完全没有      ☐偶尔会      ☐一般      ☐经常会      ☐一直如此

最近两周，您有多少次因为关注疫情，以至于你忽视了其他需求（如忽视饮食、睡觉的需求，废寝忘食等）？ [单选题] \*

☐完全没有      ☐偶尔会      ☐一般      ☐经常会      ☐一直如此

最近两周，您有多少次对不能出门、或不得不出门（如采购、办事或工作）而感到烦恼？ [单选题] \*

☐完全没有      ☐偶尔会      ☐一般      ☐经常会      ☐一直如此

最近两周，您有多少次感到因为疫情，有太多的事情需要做（如购买口罩、消毒打扫、或额外的工作），很难从容的处理？ [单选题] \*

- ☐完全没有      ☐偶尔会      ☐一般      ☐经常会      ☐一直如此

最近两周，您有多少次感到你身处的环境过于嘈杂？ [单选题] \*

- ☐完全没有      ☐偶尔会      ☐一般      ☐经常会      ☐一直如此

最近两周，您是否进行过防疫产品的采购（线上或线下，如口罩、消毒用品、药品等）？ [单选题] \*

- ☐完全没有      ☐偶尔会      ☐一般      ☐经常会      ☐一直如此

最近两周，您对防疫产品的消费是否遭到挫折（如无货、订单被取消、订购产品被征用、遇到无资质或不良商家等）？ [单选题] \*

- ☐完全没有      ☐偶尔会      ☐一般      ☐经常会      ☐一直如此

最近两周，您是否曾想过逃离网络和媒体，减少对疫情的关注？ [单选题] \*

- ☐完全没有      ☐偶尔会      ☐一般      ☐经常会      ☐一直如此

## 第二部分

下面的题目是关于新型冠状病毒肺炎**对您的影响**，请您根据自身情况如实作答。

当我感觉自己压力大的时候，我会尝试以积极主动的方式来应对（如，步步为营、从小事做起、从错误中学习、向他人求助） [单选题] \*

o完全  
不是  
这样    o1    o2    o3    o4    o5    o6    o7    o8    o9    o完全  
如此

当我感觉自己压力大的时候，我会倾向于内省（如，责怪自己、希望我有能力改变事态、希望情况会自动消失、尝试忘记整件事情） [单选题] \*

o完全  
不是  
这样    o1    o2    o3    o4    o5    o6    o7    o8    o9    o完全  
如此

面对疫情，我常有积极向上的感受（如，我感到被鼓舞，坚定，专注） [单选题] \*

o完全  
不是  
这样    o1    o2    o3    o4    o5    o6    o7    o8    o9    o完全  
如此

面对疫情，我常有消极的感觉（如，我感到沮丧、不安、紧张、羞愧、对一些人或事态有敌意） [单选题] \*

o完全  
不是  
这样    o1    o2    o3    o4    o5    o6    o7    o8    o9    o完全  
如此

总体而言，我对自己在疫情之下的生活感到满意（如，我的生活都接近理想的状况；我已经获得了生活中重要的东西） [单选题] \*

o完全  
不是  
这样    o1    o2    o3    o4    o5    o6    o7    o8    o9    o完全  
如此

总体而言，因为疫情的动态，您会沮丧、不快乐吗？（如，情绪低落、不再期待或享受生活） [单选题] \*

☐完全不是这样    ☐1    ☐2    ☐3    ☐4    ☐5    ☐6    ☐7    ☐8    ☐9    ☐完全如此

总体而言，您觉得自己总体而言有多焦虑？（如，无法放松、紧张、恐慌、感到担心） [单选题] \*

☐完全不是这样    ☐1    ☐2    ☐3    ☐4    ☐5    ☐6    ☐7    ☐8    ☐9    ☐完全如此

总体而言，您觉得疫情带给你的压力有多大？ [单选题] \*

☐完全不是这样    ☐1    ☐2    ☐3    ☐4    ☐5    ☐6    ☐7    ☐8    ☐9    ☐完全如此

您认为当前肺炎疫情对您心理造成创伤程度是？ [单选题] \*

☐基本没有创伤

☐轻度创伤

☐中度创伤

☐重度创伤

☐极重度创伤

您认为2003年非典疫情对您心理造成的损伤程度是？ [单选题] \*

☐--我没有经历过SARS--

☐基本没有创伤

☐轻度创伤

- ☐中度创伤
- ☐重度创伤
- ☐极重度创伤

您认为汶川大地震对您心理造成的损伤程度是？ [单选题] \*

- ☐--我没有经历过汶川大地震--
- ☐基本没有创伤
- ☐轻度创伤
- ☐中度创伤
- ☐重度创伤
- ☐极重度创伤

当前，您认为自己在突发疫情之下，总体的心理健康程度如何？ [单选题] \*

- ☐并不健康
- ☐01
- ☐02
- ☐03
- ☐04
- ☐05
- ☐06
- ☐07
- ☐08
- ☐09
- ☐极其健康

在这次肺炎疫情期间，您是否有寻求过心理援助？ [单选题] \*

- ☐完全没有
- ☐想过，但没有行动
- ☐想过，但不知道相关途径
- ☐有

感谢您的参与，您的作答对提高公民心理防护措施、促进健康心理建设有着重大意义。

若您想知道调查的结果、或愿意参与后续的追踪调研，您可在下面留下您的联系方式。我们将对您的联系方式进行加密处理，敬请放心。



您的手机号码：[填空题]

---

再次感谢您的参与。

如果您对此问卷有任何疑问，欢迎联系范老师（[FanJL@szu.edu.cn](mailto:FanJL@szu.edu.cn)）。

## Factor analysis of COVID-Time items

### Descriptive Statistics

|                  | Mean  | Std. Deviation <sup>a</sup> | Analysis N <sup>a</sup> | Missing N |
|------------------|-------|-----------------------------|-------------------------|-----------|
| Time_QQ          | .474  | 1.1602                      | 1240                    | 0         |
| Time_wechat      | 2.176 | 2.1301                      | 1240                    | 0         |
| Time_weibo       | 1.450 | 2.0119                      | 1240                    | 0         |
| Time_otherSNS    | .933  | 1.6123                      | 1240                    | 0         |
| Time_OnlineVideo | 1.068 | 1.7238                      | 1240                    | 0         |
| Time_OnlineNews  | 1.217 | 1.8416                      | 1240                    | 0         |
| Time_website     | .748  | 1.5044                      | 1240                    | 0         |
| Time_TV          | 1.299 | 1.8473                      | 1240                    | 0         |
| Time_BCnewspaper | .530  | 1.3860                      | 1240                    | 0         |
| Time_Other       | .483  | 1.1739                      | 1240                    | 0         |

### Correlation Matrix

|             |                  | Time_QQ | Time_wechat | Time_weibo | Time_otherSNS |
|-------------|------------------|---------|-------------|------------|---------------|
| Correlation | Time_QQ          | 1.000   | .350        | .318       | .519          |
|             | Time_wechat      | .350    | 1.000       | .424       | .485          |
|             | Time_weibo       | .318    | .424        | 1.000      | .424          |
|             | Time_otherSNS    | .519    | .485        | .424       | 1.000         |
|             | Time_OnlineVideo | .466    | .458        | .318       | .552          |
|             | Time_OnlineNews  | .479    | .556        | .263       | .527          |
|             | Time_website     | .547    | .425        | .414       | .586          |
|             | Time_TV          | .421    | .547        | .441       | .518          |
|             | Time_BCnewspaper | .541    | .359        | .301       | .471          |
|             | Time_Other       | .483    | .483        | .483       | .483          |

|                 |                  |      |      |      |      |
|-----------------|------------------|------|------|------|------|
|                 | Time_Other       | .502 | .369 | .227 | .503 |
| Sig. (1-tailed) | Time_QQ          |      | .000 | .000 | .000 |
|                 | Time_wechat      | .000 |      | .000 | .000 |
|                 | Time_weibo       | .000 | .000 |      | .000 |
|                 | Time_otherSNS    | .000 | .000 | .000 |      |
|                 | Time_OnlineVideo | .000 | .000 | .000 | .000 |
|                 | Time_OnlineNews  | .000 | .000 | .000 | .000 |
|                 | Time_website     | .000 | .000 | .000 | .000 |
|                 | Time_TV          | .000 | .000 | .000 | .000 |
|                 | Time_BCnewspaper | .000 | .000 | .000 | .000 |
|                 | Time_Other       | .000 | .000 | .000 | .000 |

### Correlation Matrix

|                 |                  | Time_OnlineVideo | Time_OnlineNews | Time_website | Time_TV |
|-----------------|------------------|------------------|-----------------|--------------|---------|
| Correlation     | Time_QQ          | .466             | .479            | .547         | .421    |
|                 | Time_wechat      | .458             | .556            | .425         | .547    |
|                 | Time_weibo       | .318             | .263            | .414         | .441    |
|                 | Time_otherSNS    | .552             | .527            | .586         | .518    |
|                 | Time_OnlineVideo | 1.000            | .506            | .548         | .532    |
|                 | Time_OnlineNews  | .506             | 1.000           | .543         | .566    |
|                 | Time_website     | .548             | .543            | 1.000        | .543    |
|                 | Time_TV          | .532             | .566            | .543         | 1.000   |
|                 | Time_BCnewspaper | .482             | .567            | .579         | .609    |
|                 | Time_Other       | .464             | .491            | .487         | .467    |
|                 |                  |                  |                 |              |         |
| Sig. (1-tailed) | Time_QQ          | .000             | .000            | .000         | .000    |
|                 | Time_wechat      | .000             | .000            | .000         | .000    |
|                 | Time_weibo       | .000             | .000            | .000         | .000    |
|                 | Time_otherSNS    | .000             | .000            | .000         | .000    |
|                 | Time_OnlineVideo |                  | .000            | .000         | .000    |
|                 | Time_OnlineNews  | .000             |                 | .000         | .000    |
|                 | Time_website     | .000             | .000            |              | .000    |
|                 | Time_TV          | .000             | .000            | .000         |         |
|                 | Time_BCnewspaper | .000             | .000            | .000         | .000    |
|                 | Time_Other       | .000             | .000            | .000         | .000    |
|                 |                  |                  |                 |              |         |

### Correlation Matrix

|             |             | Time_BCnewspaper | Time_Other |
|-------------|-------------|------------------|------------|
| Correlation | Time_QQ     | .541             | .502       |
|             | Time_wechat | .359             | .369       |

|                 |                  |       |       |
|-----------------|------------------|-------|-------|
|                 | Time_weibo       | .301  | .227  |
|                 | Time_otherSNS    | .471  | .503  |
|                 | Time_OnlineVideo | .482  | .464  |
|                 | Time_OnlineNews  | .567  | .491  |
|                 | Time_website     | .579  | .487  |
|                 | Time_TV          | .609  | .467  |
|                 | Time_BCnewspaper | 1.000 | .625  |
|                 | Time_Other       | .625  | 1.000 |
| Sig. (1-tailed) | Time_QQ          | .000  | .000  |
|                 | Time_wechat      | .000  | .000  |
|                 | Time_weibo       | .000  | .000  |
|                 | Time_otherSNS    | .000  | .000  |
|                 | Time_OnlineVideo | .000  | .000  |
|                 | Time_OnlineNews  | .000  | .000  |
|                 | Time_website     | .000  | .000  |
|                 | Time_TV          | .000  | .000  |
|                 | Time_BCnewspaper |       | .000  |
|                 | Time_Other       | .000  |       |

### KMO and Bartlett's Test

|                                                  |                    |          |
|--------------------------------------------------|--------------------|----------|
| Kaiser-Meyer-Olkin Measure of Sampling Adequacy. |                    | .915     |
| Bartlett's Test of Sphericity                    | Approx. Chi-Square | 5917.686 |
|                                                  | df                 | 45       |
|                                                  | Sig.               | .000     |

### Communalities

|                  | Initial | Extraction |
|------------------|---------|------------|
| Time_QQ          | 1.000   | .503       |
| Time_wechat      | 1.000   | .458       |
| Time_weibo       | 1.000   | .295       |
| Time_otherSNS    | 1.000   | .595       |
| Time_OnlineVideo | 1.000   | .543       |
| Time_OnlineNews  | 1.000   | .585       |
| Time_website     | 1.000   | .619       |
| Time_TV          | 1.000   | .609       |
| Time_BCnewspaper | 1.000   | .593       |
| Time_Other       | 1.000   | .506       |

Extraction Method: Principal Component Analysis.

### Total Variance Explained

| Component | Initial Eigenvalues |               |              | Extraction Sums of Squared Loadings |               |
|-----------|---------------------|---------------|--------------|-------------------------------------|---------------|
|           | Total               | % of Variance | Cumulative % | Total                               | % of Variance |
| 1         | 5.306               | 53.064        | 53.064       | 5.306                               | 53.064        |
| 2         | .950                | 9.503         | 62.566       |                                     |               |
| 3         | .713                | 7.132         | 69.698       |                                     |               |
| 4         | .600                | 5.996         | 75.695       |                                     |               |
| 5         | .520                | 5.197         | 80.892       |                                     |               |
| 6         | .489                | 4.891         | 85.783       |                                     |               |
| 7         | .432                | 4.318         | 90.101       |                                     |               |
| 8         | .373                | 3.732         | 93.833       |                                     |               |

|    |      |       |         |  |  |
|----|------|-------|---------|--|--|
| 9  | .343 | 3.429 | 97.262  |  |  |
| 10 | .274 | 2.738 | 100.000 |  |  |

**Total Variance Explained**

Extraction Sums of Squared Loadings

| Component | Cumulative % |
|-----------|--------------|
| 1         | 53.064       |
| 2         |              |
| 3         |              |
| 4         |              |
| 5         |              |
| 6         |              |
| 7         |              |
| 8         |              |
| 9         |              |
| 10        |              |

Extraction Method: Principal Component Analysis.

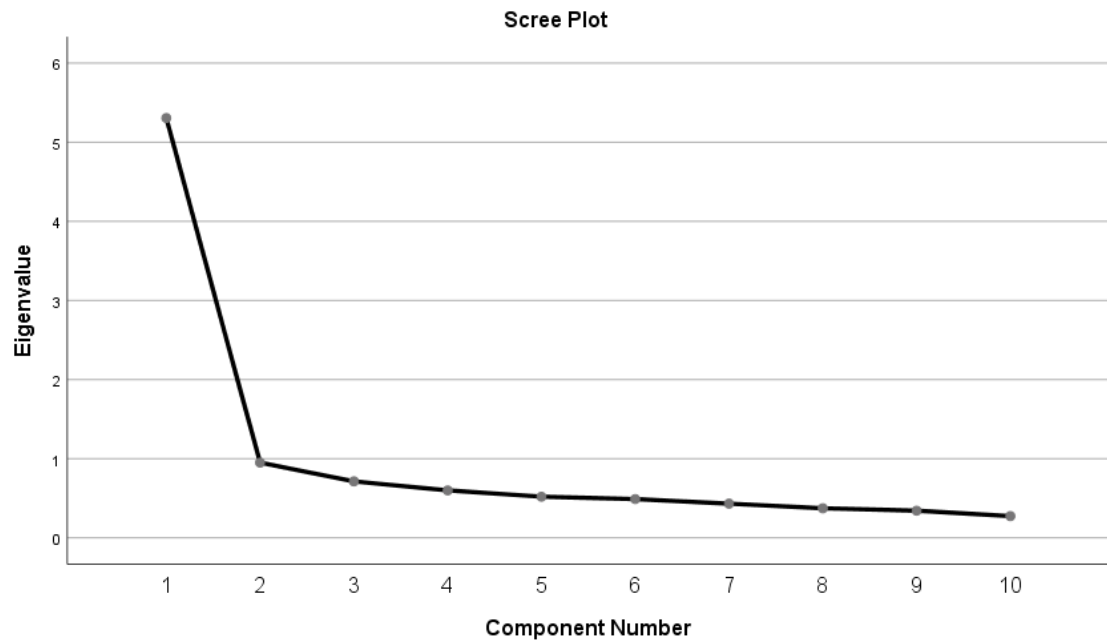

**Component Matrix<sup>a</sup>**

|                  | Component |
|------------------|-----------|
|                  | 1         |
| Time_website     | .787      |
| Time_TV          | .780      |
| Time_otherSNS    | .771      |
| Time_BCnewspaper | .770      |
| Time_OnlineNews  | .765      |
| Time_OnlineVideo | .737      |
| Time_Other       | .711      |
| Time_QQ          | .709      |
| Time_wechat      | .677      |
| Time_weibo       | .543      |



Extraction Method: Principal Component Analysis.<sup>a</sup>

a. 1 components extracted.

**Component Score Coefficient Matrix**

| Component        |      |
|------------------|------|
| 1                |      |
| Time_QQ          | .134 |
| Time_wechat      | .128 |
| Time_weibo       | .102 |
| Time_otherSNS    | .145 |
| Time_OnlineVideo | .139 |
| Time_OnlineNews  | .144 |
| Time_website     | .148 |
| Time_TV          | .147 |
| Time_BCnewspaper | .145 |
| Time_Other       | .134 |

### Descriptive Statistics

|                                         | Mean | Std. Deviation <sup>a</sup> | Analysis N <sup>a</sup> | Missing N |
|-----------------------------------------|------|-----------------------------|-------------------------|-----------|
| Q1_overwhelmed                          | 2.53 | 1.190                       | 1240                    | 0         |
| Q4_received_too_much_info               | 2.37 | 1.183                       | 1240                    | 0         |
| Q5_spend_too_much_time                  | 2.42 | 1.271                       | 1240                    | 0         |
| Q6_pressured_to_manage_<br>at_same_time | 2.12 | 1.151                       | 1240                    | 0         |
| Q16_escape                              | 1.96 | 1.179                       | 1240                    | 0         |
| Q12_additional_demands                  | 2.45 | 1.200                       | 1240                    | 0         |
| Q10_lower_sensitivity                   | 1.91 | 1.087                       | 1240                    | 0         |
| Q9_less_time_for_leisure                | 2.50 | 1.285                       | 1240                    | 0         |
| Q8_instant_messages                     | 2.37 | 1.198                       | 1240                    | 0         |
| Q7_online_social_network                | 2.72 | 1.303                       | 1240                    | 0         |

### Correlation Matrix

|             |                                         | Q1_overwhelme<br>d | Q4_received_to<br>o_much_info | Q5_spend_too_<br>much_time |
|-------------|-----------------------------------------|--------------------|-------------------------------|----------------------------|
| Correlation | Q1_overwhelmed                          | 1.000              | .552                          | .423                       |
|             | Q4_received_too_much_info               | .552               | 1.000                         | .518                       |
|             | Q5_spend_too_much_time                  | .423               | .518                          | 1.000                      |
|             | Q6_pressured_to_manage_<br>at_same_time | .477               | .584                          | .624                       |
|             | Q16_escape                              | .369               | .426                          | .431                       |
|             | Q12_additional_demands                  | .381               | .432                          | .413                       |
|             | Q10_lower_sensitivity                   | .387               | .473                          | .504                       |
|             | Q9_less_time_for_leisure                | .311               | .349                          | .416                       |
|             | Q8_instant_messages                     | .425               | .539                          | .575                       |
|             | Q7_online_social_network                | .330               | .441                          | .544                       |

|                 |                                         |      |      |      |
|-----------------|-----------------------------------------|------|------|------|
| Sig. (1-tailed) | Q1_overwhelmed                          |      | .000 | .000 |
|                 | Q4_received_too_much_info               | .000 |      | .000 |
|                 | Q5_spend_too_much_time                  | .000 | .000 |      |
|                 | Q6_pressured_to_manage_<br>at_same_time | .000 | .000 | .000 |
|                 | Q16_escape                              | .000 | .000 | .000 |
|                 | Q12_additional_demands                  | .000 | .000 | .000 |
|                 | Q10_lower_sensitivity                   | .000 | .000 | .000 |
|                 | Q9_less_time_for_leisure                | .000 | .000 | .000 |
|                 | Q8_instant_messages                     | .000 | .000 | .000 |
|                 | Q7_online_social_network                | .000 | .000 | .000 |
|                 |                                         |      |      |      |

### Correlation Matrix

|                 |                                     | Q6_pressured_to_manage_at_same_time | Q16_escape | Q12_additional_demands |
|-----------------|-------------------------------------|-------------------------------------|------------|------------------------|
| Correlation     | Q1_overwhelmed                      | .477                                | .369       | .381                   |
|                 | Q4_received_too_much_info           | .584                                | .426       | .432                   |
|                 | Q5_spend_too_much_time              | .624                                | .431       | .413                   |
|                 | Q6_pressured_to_manage_at_same_time | 1.000                               | .496       | .484                   |
|                 | Q16_escape                          | .496                                | 1.000      | .400                   |
|                 | Q12_additional_demands              | .484                                | .400       | 1.000                  |
|                 | Q10_lower_sensitivity               | .568                                | .467       | .512                   |
|                 | Q9_less_time_for_leisure            | .426                                | .370       | .466                   |
|                 | Q8_instant_messages                 | .653                                | .501       | .472                   |
|                 | Q7_online_social_network            | .553                                | .441       | .383                   |
| Sig. (1-tailed) | Q1_overwhelmed                      | .000                                | .000       | .000                   |
|                 | Q4_received_too_much_info           | .000                                | .000       | .000                   |
|                 | Q5_spend_too_much_time              | .000                                | .000       | .000                   |
|                 | Q6_pressured_to_manage_at_same_time |                                     | .000       | .000                   |
|                 | Q16_escape                          | .000                                |            | .000                   |
|                 | Q12_additional_demands              | .000                                | .000       |                        |
|                 | Q10_lower_sensitivity               | .000                                | .000       | .000                   |
|                 | Q9_less_time_for_leisure            | .000                                | .000       | .000                   |
|                 | Q8_instant_messages                 | .000                                | .000       | .000                   |
|                 | Q7_online_social_network            | .000                                | .000       | .000                   |

### Correlation Matrix

|  | Q10_lower_sensitivity | Q9_less_time_for_leisure | Q8_instant_messages |
|--|-----------------------|--------------------------|---------------------|
|  |                       |                          |                     |

|                 |                                     |       |       |       |
|-----------------|-------------------------------------|-------|-------|-------|
| Correlation     | Q1_overwhelmed                      | .387  | .311  | .425  |
|                 | Q4_received_too_much_info           | .473  | .349  | .539  |
|                 | Q5_spend_too_much_time              | .504  | .416  | .575  |
|                 | Q6_pressured_to_manage_at_same_time | .568  | .426  | .653  |
|                 | Q16_escape                          | .467  | .370  | .501  |
|                 | Q12_additional_demands              | .512  | .466  | .472  |
|                 | Q10_lower_sensitivity               | 1.000 | .525  | .500  |
|                 | Q9_less_time_for_leisure            | .525  | 1.000 | .497  |
|                 | Q8_instant_messages                 | .500  | .497  | 1.000 |
|                 | Q7_online_social_network            | .389  | .444  | .700  |
| Sig. (1-tailed) | Q1_overwhelmed                      | .000  | .000  | .000  |
|                 | Q4_received_too_much_info           | .000  | .000  | .000  |
|                 | Q5_spend_too_much_time              | .000  | .000  | .000  |
|                 | Q6_pressured_to_manage_at_same_time | .000  | .000  | .000  |
|                 | Q16_escape                          | .000  | .000  | .000  |
|                 | Q12_additional_demands              | .000  | .000  | .000  |
|                 | Q10_lower_sensitivity               |       | .000  | .000  |
|                 | Q9_less_time_for_leisure            | .000  |       | .000  |
|                 | Q8_instant_messages                 | .000  | .000  |       |
|                 | Q7_online_social_network            | .000  | .000  | .000  |

### Correlation Matrix

|             |                           |                          |
|-------------|---------------------------|--------------------------|
|             |                           | Q7_online_social_network |
| Correlation | Q1_overwhelmed            | .330                     |
|             | Q4_received_too_much_info | .441                     |
|             | Q5_spend_too_much_time    | .544                     |

|                 |                                     |       |
|-----------------|-------------------------------------|-------|
|                 | Q6_pressured_to_manage_at_same_time | .553  |
|                 | Q16_escape                          | .441  |
|                 | Q12_additional_demands              | .383  |
|                 | Q10_lower_sensitivity               | .389  |
|                 | Q9_less_time_for_leisure            | .444  |
|                 | Q8_instant_messages                 | .700  |
|                 | Q7_online_social_network            | 1.000 |
| Sig. (1-tailed) | Q1_overwhelmed                      | .000  |
|                 | Q4_received_too_much_info           | .000  |
|                 | Q5_spend_too_much_time              | .000  |
|                 | Q6_pressured_to_manage_at_same_time | .000  |
|                 | Q16_escape                          | .000  |
|                 | Q12_additional_demands              | .000  |
|                 | Q10_lower_sensitivity               | .000  |
|                 | Q9_less_time_for_leisure            | .000  |
|                 | Q8_instant_messages                 | .000  |
|                 | Q7_online_social_network            |       |

### KMO and Bartlett's Test

|                                                  |                    |          |
|--------------------------------------------------|--------------------|----------|
| Kaiser-Meyer-Olkin Measure of Sampling Adequacy. |                    | .924     |
| Bartlett's Test of Sphericity                    | Approx. Chi-Square | 5793.996 |
|                                                  | df                 | 45       |
|                                                  | Sig.               | .000     |

### Communalities

|                                         | Initial | Extraction |
|-----------------------------------------|---------|------------|
| Q1_overwhelmed                          | 1.000   | .400       |
| Q4_received_too_much_info               | 1.000   | .541       |
| Q5_spend_too_much_time                  | 1.000   | .576       |
| Q6_pressured_to_manage_a<br>t_same_time | 1.000   | .673       |
| Q16_escape                              | 1.000   | .451       |
| Q12_additional_demands                  | 1.000   | .457       |
| Q10_lower_sensitivity                   | 1.000   | .540       |
| Q9_less_time_for_leisure                | 1.000   | .430       |
| Q8_instant_messages                     | 1.000   | .671       |
| Q7_online_social_network                | 1.000   | .529       |

Extraction Method: Principal Component Analysis.

### Total Variance Explained

| Component | Initial Eigenvalues |               |              | Extraction Sums of Squared Loadings |               |
|-----------|---------------------|---------------|--------------|-------------------------------------|---------------|
|           | Total               | % of Variance | Cumulative % | Total                               | % of Variance |
| 1         | 5.268               | 52.678        | 52.678       | 5.268                               | 52.678        |
| 2         | .838                | 8.385         | 61.062       |                                     |               |
| 3         | .795                | 7.948         | 69.010       |                                     |               |
| 4         | .614                | 6.137         | 75.147       |                                     |               |
| 5         | .543                | 5.434         | 80.581       |                                     |               |
| 6         | .520                | 5.201         | 85.782       |                                     |               |
| 7         | .426                | 4.260         | 90.042       |                                     |               |
| 8         | .390                | 3.898         | 93.940       |                                     |               |

|    |      |       |         |  |  |
|----|------|-------|---------|--|--|
| 9  | .337 | 3.367 | 97.307  |  |  |
| 10 | .269 | 2.693 | 100.000 |  |  |

Total Variance Explained

Extraction Sums of Squared Loadings

| Component | Cumulative % |
|-----------|--------------|
| 1         | 52.678       |

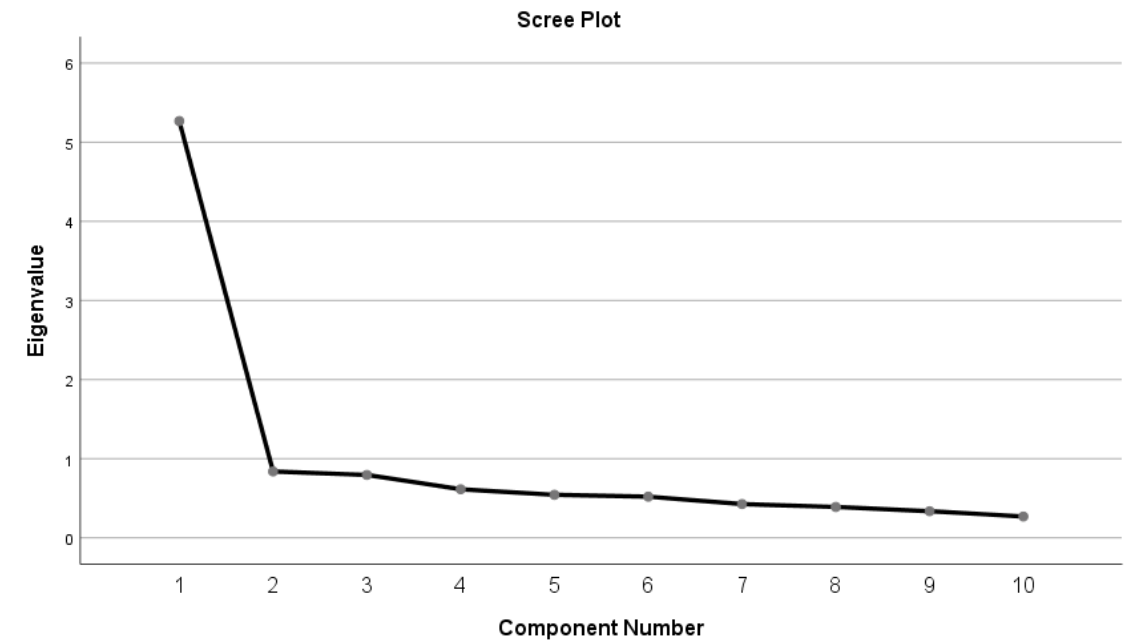

Component Matrix<sup>a</sup>

|                                         | Component |
|-----------------------------------------|-----------|
|                                         | 1         |
| Q6_pressured_to_manage_a<br>t_same_time | .820      |
| Q8_instant_messages                     | .819      |
| Q5_spend_too_much_time                  | .759      |



|                           |      |
|---------------------------|------|
| Q4_received_too_much_info | .735 |
| Q10_lower_sensitivity     | .735 |
| Q7_online_social_network  | .727 |
| Q12_additional_demands    | .676 |
| Q16_escape                | .672 |
| Q9_less_time_for_leisure  | .656 |
| Q1_overwhelmed            | .633 |

Extraction Method: Principal Component Analysis.<sup>a</sup>

a. 1 components extracted.

# **Component Score Coefficient Matrix**

Component

1

|                                         |      |
|-----------------------------------------|------|
| Q1_overwhelmed                          | .120 |
| Q4_received_too_much_info               | .140 |
| Q5_spend_too_much_time                  | .144 |
| Q6_pressured_to_manage_a<br>t_same_time | .156 |
| Q16_escape                              | .128 |
| Q12_additional_demands                  | .128 |
| Q10_lower_sensitivity                   | .140 |
| Q9_less_time_for_leisure                | .124 |
| Q8_instant_messages                     | .155 |
| Q7_online_social_network                | .138 |

## ANCOVAS EXAMINING EFFECTS OF COVID VARIABLES ON WELLBEING OUTCOMES

### Between-Subjects Factors

|                              | N |     |
|------------------------------|---|-----|
| Percentile Group of COVID_IO | 1 | 427 |
|                              | 2 | 411 |
|                              | 3 | 402 |

### Descriptive Statistics

Dependent Variable: POSWB

| Percentile Group of COVID_IO | Mean    | Std. Deviation | N    |
|------------------------------|---------|----------------|------|
| 1                            | 22.0304 | 4.83983        | 427  |
| 2                            | 19.5669 | 4.99973        | 411  |
| 3                            | 18.1219 | 5.23155        | 402  |
| Total                        | 19.9468 | 5.27336        | 1240 |

### Tests of Between-Subjects Effects

Dependent Variable: POSWB

| Source          | Type III Sum of Squares | df | Mean Square | F       | Sig. | Partial Eta Squared |
|-----------------|-------------------------|----|-------------|---------|------|---------------------|
| Corrected Model | 15414.872 <sup>a</sup>  | 10 | 1541.487    | 99.502  | .000 | .447                |
| Intercept       | 875.510                 | 1  | 875.510     | 56.514  | .000 | .044                |
| NCOVID_I        | 276.933                 | 2  | 138.467     | 8.938   | .000 | .014                |
| GENIO           | 60.818                  | 1  | 60.818      | 3.926   | .048 | .003                |
| PSYCAP          | 4026.421                | 1  | 4026.421    | 259.904 | .000 | .175                |
| NEGCOP          | 239.690                 | 1  | 239.690     | 15.472  | .000 | .012                |

|                 |            |      |          |         |      |      |
|-----------------|------------|------|----------|---------|------|------|
| POSCOP          | 2259.021   | 1    | 2259.021 | 145.819 | .000 | .106 |
| NPANIC_C        | 438.920    | 1    | 438.920  | 28.332  | .000 | .023 |
| NCOVID_T        | 12.025     | 1    | 12.025   | .776    | .378 | .001 |
| NMASKS          | .005       | 1    | .005     | .000    | .985 | .000 |
| NCOVID_A        | 5.660      | 1    | 5.660    | .365    | .546 | .000 |
| Error           | 19039.615  | 1229 | 15.492   |         |      |      |
| Total           | 527818.000 | 1240 |          |         |      |      |
| Corrected Total | 34454.487  | 1239 |          |         |      |      |

a. R Squared = .447 (Adjusted R Squared = .443)

## Estimated Marginal Means

## Percentile Group of COVID\_IO

### Estimates

Dependent Variable: POSWB

| Percentile Group of<br>COVID_IO | Mean                | Std. Error | 95% Confidence Interval |             |
|---------------------------------|---------------------|------------|-------------------------|-------------|
|                                 |                     |            | Lower Bound             | Upper Bound |
| 1                               | 20.805 <sup>a</sup> | .233       | 20.348                  | 21.263      |

|   |                     |      |        |        |
|---|---------------------|------|--------|--------|
| 2 | 19.648 <sup>a</sup> | .195 | 19.266 | 20.031 |
| 3 | 19.340 <sup>a</sup> | .252 | 18.845 | 19.835 |

a. Covariates appearing in the model are evaluated at the following values: GENIO = 8.1903, PSYCAP = 22.7258, NEGCOP = 6.28, POSCOP = 6.83, Percentile Group of PANIC\_COVID = 1.93, Percentile Group of COVID\_TIME = 2.00, Percentile Group of MASKS = 1.94, Percentile Group of COVID\_ATT = 2.33.

### Pairwise Comparisons

Dependent Variable: POSWB

| (I) Percentile Group of COVID_IO | (J) Percentile Group of COVID_IO | Mean Difference (I-J) | Std. Error | Sig. <sup>b</sup> |
|----------------------------------|----------------------------------|-----------------------|------------|-------------------|
| 1                                | 2                                | 1.157 <sup>*</sup>    | .298       | .000              |
|                                  | 3                                | 1.465 <sup>*</sup>    | .401       | .000              |
| 2                                | 1                                | -1.157 <sup>*</sup>   | .298       | .000              |
|                                  | 3                                | .308                  | .326       | .345              |
| 3                                | 1                                | -1.465 <sup>*</sup>   | .401       | .000              |
|                                  | 2                                | -.308                 | .326       | .345              |

### Pairwise Comparisons

Dependent Variable: POSWB

| (I) Percentile Group of COVID_IO | (J) Percentile Group of COVID_IO | 95% Confidence Interval for Difference <sup>b</sup> |             |
|----------------------------------|----------------------------------|-----------------------------------------------------|-------------|
|                                  |                                  | Lower Bound                                         | Upper Bound |
| 1                                | 2                                | .573                                                | 1.741       |
|                                  | 3                                | .679                                                | 2.251       |
| 2                                | 1                                | -1.741                                              | -.573       |
|                                  | 3                                | -.332                                               | .948        |
| 3                                | 1                                | -2.251                                              | -.679       |

|   |       |      |
|---|-------|------|
| 2 | -.948 | .332 |
|---|-------|------|

Based on estimated marginal means

\*. The mean difference is significant at the .05 level.

b. Adjustment for multiple comparisons: Least Significant Difference (equivalent to no adjustments).

### Univariate Tests

Dependent Variable: POSWB

|          | Sum of Squares | df   | Mean Square | F     | Sig. | Partial Eta Squared |
|----------|----------------|------|-------------|-------|------|---------------------|
| Contrast | 276.933        | 2    | 138.467     | 8.938 | .000 | .014                |
| Error    | 19039.615      | 1229 | 15.492      |       |      |                     |

### Between-Subjects Factors

N

|                                 |   |     |
|---------------------------------|---|-----|
| Percentile Group of<br>COVID_IO | 1 | 427 |
|                                 | 2 | 411 |
|                                 | 3 | 402 |

### Descriptive Statistics

Dependent Variable: NEGWB

| Percentile Group of<br>COVID_IO | Mean    | Std. Deviation | N   |
|---------------------------------|---------|----------------|-----|
| 1                               | 13.2014 | 6.71392        | 427 |
| 2                               | 18.6399 | 7.36583        | 411 |
| 3                               | 26.6940 | 6.97937        | 402 |

|       |         |         |      |
|-------|---------|---------|------|
| Total | 19.3782 | 8.93938 | 1240 |
|-------|---------|---------|------|

### Tests of Between-Subjects Effects

Dependent Variable: NEGWB

| Source          | Type III Sum of Squares | df   | Mean Square | F       | Sig. | Partial Eta Squared |
|-----------------|-------------------------|------|-------------|---------|------|---------------------|
| Corrected Model | 53285.592 <sup>a</sup>  | 10   | 5328.559    | 143.218 | .000 | .538                |
| Intercept       | 2783.851                | 1    | 2783.851    | 74.823  | .000 | .057                |
| NCOVID_I        | 4385.219                | 2    | 2192.609    | 58.932  | .000 | .088                |
| GENIO           | 2193.799                | 1    | 2193.799    | 58.964  | .000 | .046                |
| PSYCAP          | 2633.097                | 1    | 2633.097    | 70.771  | .000 | .054                |
| NEGCOP          | 2475.668                | 1    | 2475.668    | 66.540  | .000 | .051                |
| POSCOP          | 133.951                 | 1    | 133.951     | 3.600   | .058 | .003                |
| NPANIC_C        | 4078.152                | 1    | 4078.152    | 109.610 | .000 | .082                |
| NCOVID_T        | 3.026                   | 1    | 3.026       | .081    | .776 | .000                |
| NMASKS          | 1.183                   | 1    | 1.183       | .032    | .859 | .000                |
| NCOVID_A        | 189.524                 | 1    | 189.524     | 5.094   | .024 | .004                |
| Error           | 45726.020               | 1229 | 37.206      |         |      |                     |
| Total           | 564651.000              | 1240 |             |         |      |                     |
| Corrected Total | 99011.612               | 1239 |             |         |      |                     |

a. R Squared = .538 (Adjusted R Squared = .534)

### Estimated Marginal Means

## Percentile Group of COVID\_IO

### Estimates

Dependent Variable: NEGWB

| Percentile Group of<br>COVID_IO | Mean                | Std. Error | 95% Confidence Interval |             |
|---------------------------------|---------------------|------------|-------------------------|-------------|
|                                 |                     |            | Lower Bound             | Upper Bound |
| 1                               | 16.352 <sup>a</sup> | .362       | 15.643                  | 17.062      |
| 2                               | 18.923 <sup>a</sup> | .302       | 18.330                  | 19.516      |
| 3                               | 23.058 <sup>a</sup> | .391       | 22.291                  | 23.824      |

a. Covariates appearing in the model are evaluated at the following values: GENIO = 8.1903, PSYCAP = 22.7258, NEG COP = 6.28, POS COP = 6.83, Percentile Group of PANIC\_COVID = 1.93, Percentile Group of COVID\_TIME = 2.00, Percentile Group of MASKS = 1.94, Percentile Group of COVID\_ATT = 2.33.

### Pairwise Comparisons

Dependent Variable: NEGWB

| (I) Percentile Group of<br>COVID_IO | (J) Percentile Group of<br>COVID_IO | Mean Difference<br>(I-J) | Std. Error | Sig. <sup>b</sup> |
|-------------------------------------|-------------------------------------|--------------------------|------------|-------------------|
| 1                                   | 2                                   | -2.570 <sup>*</sup>      | .461       | .000              |
|                                     | 3                                   | -6.705 <sup>*</sup>      | .621       | .000              |
| 2                                   | 1                                   | 2.570 <sup>*</sup>       | .461       | .000              |
|                                     | 3                                   | -4.135 <sup>*</sup>      | .505       | .000              |



|   |   |                    |      |      |
|---|---|--------------------|------|------|
| 3 | 1 | 6.705 <sup>*</sup> | .621 | .000 |
|   | 2 | 4.135 <sup>*</sup> | .505 | .000 |

### Pairwise Comparisons

Dependent Variable: NEGWB

|                                  |                                  | 95% Confidence Interval for Difference <sup>b</sup> |             |
|----------------------------------|----------------------------------|-----------------------------------------------------|-------------|
| (I) Percentile Group of COVID_IO | (J) Percentile Group of COVID_IO | Lower Bound                                         | Upper Bound |
| 1                                | 2                                | -3.475                                              | -1.665      |
|                                  | 3                                | -7.924                                              | -5.487      |
| 2                                | 1                                | 1.665                                               | 3.475       |
|                                  | 3                                | -5.127                                              | -3.144      |
| 3                                | 1                                | 5.487                                               | 7.924       |
|                                  | 2                                | 3.144                                               | 5.127       |

Based on estimated marginal means

\*. The mean difference is significant at the .05 level.

b. Adjustment for multiple comparisons: Least Significant Difference (equivalent to no adjustments).

### Univariate Tests

Dependent Variable: NEGWB

|          | Sum of Squares | df   | Mean Square | F      | Sig. | Partial Eta Squared |
|----------|----------------|------|-------------|--------|------|---------------------|
| Contrast | 4385.219       | 2    | 2192.609    | 58.932 | .000 | .088                |
| Error    | 45726.020      | 1229 | 37.206      |        |      |                     |

### Between-Subjects Factors

N

|                                  |   |     |
|----------------------------------|---|-----|
| Percentile Group of<br>COVID_ATT | 1 | 124 |
|                                  | 2 | 581 |
|                                  | 3 | 535 |

### Descriptive Statistics

Dependent Variable: NEGWB

| Percentile Group of<br>COVID_ATT | Mean    | Std. Deviation | N    |
|----------------------------------|---------|----------------|------|
| 1                                | 17.1532 | 7.67219        | 124  |
| 2                                | 18.8571 | 8.57031        | 581  |
| 3                                | 20.4598 | 9.45845        | 535  |
| Total                            | 19.3782 | 8.93938        | 1240 |

### Tests of Between-Subjects Effects

Dependent Variable: NEGWB

| Source          | Type III Sum of<br>Squares | df | Mean Square | F       | Sig. | Partial Eta<br>Squared |
|-----------------|----------------------------|----|-------------|---------|------|------------------------|
| Corrected Model | 53121.771 <sup>a</sup>     | 10 | 5312.177    | 142.268 | .000 | .537                   |
| Intercept       | 1090.808                   | 1  | 1090.808    | 29.213  | .000 | .023                   |
| NCOVID_A        | 200.899                    | 2  | 100.450     | 2.690   | .068 | .004                   |
| GENIO           | 2308.260                   | 1  | 2308.260    | 61.819  | .000 | .048                   |
| PSYCAP          | 2597.323                   | 1  | 2597.323    | 69.560  | .000 | .054                   |
| NEGCOP          | 2517.609                   | 1  | 2517.609    | 67.425  | .000 | .052                   |
| POSCOP          | 132.957                    | 1  | 132.957     | 3.561   | .059 | .003                   |
| NPANIC_C        | 4169.623                   | 1  | 4169.623    | 111.669 | .000 | .083                   |
| NCOVID_T        | 5.389                      | 1  | 5.389       | .144    | .704 | .000                   |

|                 |            |      |          |         |      |      |
|-----------------|------------|------|----------|---------|------|------|
| NMASKS          | 2.063      | 1    | 2.063    | .055    | .814 | .000 |
| NCOVID_I        | 4210.037   | 1    | 4210.037 | 112.751 | .000 | .084 |
| Error           | 45889.841  | 1229 | 37.339   |         |      |      |
| Total           | 564651.000 | 1240 |          |         |      |      |
| Corrected Total | 99011.612  | 1239 |          |         |      |      |

a. R Squared = .537 (Adjusted R Squared = .533)

## Estimated Marginal Means

## Percentile Group of COVID\_ATT

### Estimates

Dependent Variable: NEGWB

| Percentile Group of<br>COVID_ATT | Mean                | Std. Error | 95% Confidence Interval |             |
|----------------------------------|---------------------|------------|-------------------------|-------------|
|                                  |                     |            | Lower Bound             | Upper Bound |
| 1                                | 18.588 <sup>a</sup> | .566       | 17.477                  | 19.699      |
| 2                                | 19.128 <sup>a</sup> | .255       | 18.628                  | 19.628      |
| 3                                | 19.833 <sup>a</sup> | .271       | 19.302                  | 20.364      |

a. Covariates appearing in the model are evaluated at the following values: GENIO = 8.1903, PSYCAP = 22.7258, NEGCOP = 6.28, POSCOP = 6.83, Percentile Group of PANIC\_COVID = 1.93, Percentile Group of COVID\_TIME = 2.00, Percentile Group of MASKS = 1.94, Percentile Group of COVID\_IO = 1.98.

### Pairwise Comparisons

Dependent Variable: NEGWB

| (I) Percentile Group of<br>COVID_ATT | (J) Percentile Group of<br>COVID_ATT | Mean Difference<br>(I-J) | Std. Error | Sig. <sup>a</sup> |
|--------------------------------------|--------------------------------------|--------------------------|------------|-------------------|
| 1                                    | 2                                    | -.540                    | .616       | .381              |
|                                      | 3                                    | -1.245                   | .640       | .052              |
| 2                                    | 1                                    | .540                     | .616       | .381              |
|                                      | 3                                    | -.705                    | .376       | .061              |
| 3                                    | 1                                    | 1.245                    | .640       | .052              |
|                                      | 2                                    | .705                     | .376       | .061              |

### Pairwise Comparisons

Dependent Variable: NEGWB

| (I) Percentile Group of<br>COVID_ATT | (J) Percentile Group of<br>COVID_ATT | 95% Confidence Interval for Difference <sup>a</sup> |             |
|--------------------------------------|--------------------------------------|-----------------------------------------------------|-------------|
|                                      |                                      | Lower Bound                                         | Upper Bound |
| 1                                    | 2                                    | -1.749                                              | .668        |
|                                      | 3                                    | -2.501                                              | .011        |
| 2                                    | 1                                    | -.668                                               | 1.749       |
|                                      | 3                                    | -1.442                                              | .033        |
| 3                                    | 1                                    | -.011                                               | 2.501       |
|                                      | 2                                    | -.033                                               | 1.442       |

Based on estimated marginal means

a. Adjustment for multiple comparisons: Least Significant Difference (equivalent to no adjustments).

### Univariate Tests

Dependent Variable: NEGWB

|          | Sum of Squares | df   | Mean Square | F     | Sig. | Partial Eta Squared |
|----------|----------------|------|-------------|-------|------|---------------------|
| Contrast | 200.899        | 2    | 100.450     | 2.690 | .068 | .004                |
| Error    | 45889.841      | 1229 | 37.339      |       |      |                     |

### Between-Subjects Factors

|                               | N |     |
|-------------------------------|---|-----|
| Percentile Group of COVID_ATT | 1 | 124 |
|                               | 2 | 581 |
|                               | 3 | 535 |

### Descriptive Statistics

Dependent Variable: POSWB

| Percentile Group of COVID_ATT | Mean    | Std. Deviation | N    |
|-------------------------------|---------|----------------|------|
| 1                             | 19.9113 | 5.18599        | 124  |
| 2                             | 19.8744 | 5.02782        | 581  |
| 3                             | 20.0336 | 5.55487        | 535  |
| Total                         | 19.9468 | 5.27336        | 1240 |

### Tests of Between-Subjects Effects

Dependent Variable: POSWB

| Source          | Type III Sum of Squares | df   | Mean Square | F       | Sig. | Partial Eta Squared |
|-----------------|-------------------------|------|-------------|---------|------|---------------------|
| Corrected Model | 15377.473 <sup>a</sup>  | 10   | 1537.747    | 99.066  | .000 | .446                |
| Intercept       | 1505.342                | 1    | 1505.342    | 96.979  | .000 | .073                |
| NCOVID_A        | 16.087                  | 2    | 8.044       | .518    | .596 | .001                |
| GENIO           | 52.121                  | 1    | 52.121      | 3.358   | .067 | .003                |
| PSYCAP          | 4056.889                | 1    | 4056.889    | 261.357 | .000 | .175                |
| NEGCOP          | 248.540                 | 1    | 248.540     | 16.012  | .000 | .013                |
| POSCOP          | 2263.302                | 1    | 2263.302    | 145.809 | .000 | .106                |
| NPANIC_C        | 426.337                 | 1    | 426.337     | 27.466  | .000 | .022                |
| NCOVID_T        | 15.072                  | 1    | 15.072      | .971    | .325 | .001                |
| NMASKS          | .066                    | 1    | .066        | .004    | .948 | .000                |
| NCOVID_I        | 231.318                 | 1    | 231.318     | 14.902  | .000 | .012                |
| Error           | 19077.014               | 1229 | 15.522      |         |      |                     |
| Total           | 527818.000              | 1240 |             |         |      |                     |
| Corrected Total | 34454.487               | 1239 |             |         |      |                     |

a. R Squared = .446 (Adjusted R Squared = .442)

## Estimated Marginal Means

## Percentile Group of COVID\_ATT

### Estimates

Dependent Variable: POSWB

| Percentile Group of<br>COVID_ATT | Mean                | Std. Error | 95% Confidence Interval |             |
|----------------------------------|---------------------|------------|-------------------------|-------------|
|                                  |                     |            | Lower Bound             | Upper Bound |
| 1                                | 20.294 <sup>a</sup> | .365       | 19.578                  | 21.010      |
| 2                                | 19.892 <sup>a</sup> | .164       | 19.569                  | 20.214      |
| 3                                | 19.926 <sup>a</sup> | .174       | 19.584                  | 20.268      |

a. Covariates appearing in the model are evaluated at the following values: GENIO = 8.1903, PSYCAP = 22.7258, NEG COP = 6.28, POS COP = 6.83, Percentile Group of PANIC\_COVID = 1.93, Percentile Group of COVID\_TIME = 2.00, Percentile Group of MASKS = 1.94, Percentile Group of COVID\_IO = 1.98.

### Pairwise Comparisons

Dependent Variable: POSWB

| (I) Percentile Group of<br>COVID_ATT | (J) Percentile Group of<br>COVID_ATT | Mean Difference<br>(I-J) | Std. Error | Sig. <sup>a</sup> |
|--------------------------------------|--------------------------------------|--------------------------|------------|-------------------|
| 1                                    | 2                                    | .402                     | .397       | .311              |
|                                      | 3                                    | .368                     | .413       | .373              |
| 2                                    | 1                                    | -.402                    | .397       | .311              |
|                                      | 3                                    | -.034                    | .242       | .887              |
| 3                                    | 1                                    | -.368                    | .413       | .373              |
|                                      | 2                                    | .034                     | .242       | .887              |

### Pairwise Comparisons

Dependent Variable: POSWB

| (I) Percentile Group of<br>COVID_ATT | (J) Percentile Group of<br>COVID_ATT | 95% Confidence Interval for Difference <sup>a</sup> |             |
|--------------------------------------|--------------------------------------|-----------------------------------------------------|-------------|
|                                      |                                      | Lower Bound                                         | Upper Bound |
| 1                                    | 2                                    | -.377                                               | 1.182       |
|                                      | 3                                    | -.442                                               | 1.178       |
| 2                                    | 1                                    | -1.182                                              | .377        |
|                                      | 3                                    | -.510                                               | .441        |
| 3                                    | 1                                    | -1.178                                              | .442        |
|                                      | 2                                    | -.441                                               | .510        |

Based on estimated marginal means

a. Adjustment for multiple comparisons: Least Significant Difference (equivalent to no adjustments).

### Univariate Tests

Dependent Variable: POSWB

|          | Sum of Squares | df   | Mean Square | F    | Sig. | Partial Eta Squared |
|----------|----------------|------|-------------|------|------|---------------------|
| Contrast | 16.087         | 2    | 8.044       | .518 | .596 | .001                |
| Error    | 19077.014      | 1229 | 15.522      |      |      |                     |

### Between-Subjects Factors

|                           | N |     |
|---------------------------|---|-----|
| Percentile Group of MASKS | 1 | 444 |
|                           | 2 | 421 |
|                           | 3 | 375 |



## Descriptive Statistics

Dependent Variable: POSWB

| Percentile Group of MASKS | Mean    | Std. Deviation | N    |
|---------------------------|---------|----------------|------|
| 1                         | 21.4955 | 5.16434        | 444  |
| 2                         | 19.2280 | 4.89560        | 421  |
| 3                         | 18.9200 | 5.39746        | 375  |
| Total                     | 19.9468 | 5.27336        | 1240 |

## Tests of Between-Subjects Effects

Dependent Variable: POSWB

| Source          | Type III Sum of Squares | df   | Mean Square | F       | Sig. | Partial Eta Squared |
|-----------------|-------------------------|------|-------------|---------|------|---------------------|
| Corrected Model | 15444.300 <sup>a</sup>  | 10   | 1544.430    | 99.847  | .000 | .448                |
| Intercept       | 1443.037                | 1    | 1443.037    | 93.292  | .000 | .071                |
| NMASKS          | 78.113                  | 2    | 39.057      | 2.525   | .080 | .004                |
| GENIO           | 51.036                  | 1    | 51.036      | 3.299   | .070 | .003                |
| PSYCAP          | 4041.489                | 1    | 4041.489    | 261.280 | .000 | .175                |
| NEGCOP          | 237.325                 | 1    | 237.325     | 15.343  | .000 | .012                |
| POSCOP          | 2220.032                | 1    | 2220.032    | 143.524 | .000 | .105                |
| NPANIC_C        | 431.143                 | 1    | 431.143     | 27.873  | .000 | .022                |
| NCOVID_T        | 13.942                  | 1    | 13.942      | .901    | .343 | .001                |
| NCOVID_I        | 218.481                 | 1    | 218.481     | 14.125  | .000 | .011                |
| NCOVID_A        | 4.423                   | 1    | 4.423       | .286    | .593 | .000                |
| Error           | 19010.188               | 1229 | 15.468      |         |      |                     |
| Total           | 527818.000              | 1240 |             |         |      |                     |
| Corrected Total | 34454.487               | 1239 |             |         |      |                     |

a. R Squared = .448 (Adjusted R Squared = .444)

## Estimated Marginal Means

## Percentile Group of MASKS

### Estimates

Dependent Variable: POSWB

| Percentile Group of MASKS | Mean                | Std. Error | 95% Confidence Interval |             |
|---------------------------|---------------------|------------|-------------------------|-------------|
|                           |                     |            | Lower Bound             | Upper Bound |
| 1                         | 20.118 <sup>a</sup> | .208       | 19.710                  | 20.527      |
| 2                         | 19.596 <sup>a</sup> | .192       | 19.218                  | 19.973      |
| 3                         | 20.138 <sup>a</sup> | .225       | 19.697                  | 20.579      |

a. Covariates appearing in the model are evaluated at the following values: GENIO = 8.1903, PSYCAP = 22.7258, NEGCOP = 6.28, POSCOP = 6.83, Percentile Group of PANIC\_COVID = 1.93, Percentile Group of COVID\_TIME = 2.00, Percentile Group of COVID\_IO = 1.98, Percentile Group of COVID\_ATT = 2.33.

## Pairwise Comparisons

Dependent Variable: POSWB

| (I) Percentile Group of MASKS | (J) Percentile Group of MASKS | Mean Difference (I-J) | Std. Error | Sig. <sup>a</sup> |
|-------------------------------|-------------------------------|-----------------------|------------|-------------------|
| 1                             | 2                             | .523                  | .288       | .069              |
|                               | 3                             | -.020                 | .334       | .953              |
| 2                             | 1                             | -.523                 | .288       | .069              |
|                               | 3                             | -.542                 | .292       | .064              |
| 3                             | 1                             | .020                  | .334       | .953              |
|                               | 2                             | .542                  | .292       | .064              |

Pairwise Comparisons

Dependent Variable: POSWB

| 95% Confidence Interval for Difference <sup>a</sup> |                               |             |             |  |
|-----------------------------------------------------|-------------------------------|-------------|-------------|--|
| (I) Percentile Group of MASKS                       | (J) Percentile Group of MASKS | Lower Bound | Upper Bound |  |
| 1                                                   | 2                             | -.041       | 1.087       |  |
|                                                     | 3                             | -.675       | .636        |  |
| 2                                                   | 1                             | -1.087      | .041        |  |
|                                                     | 3                             | -1.116      | .031        |  |
| 3                                                   | 1                             | -.636       | .675        |  |
|                                                     | 2                             | -.031       | 1.116       |  |

Based on estimated marginal means

a. Adjustment for multiple comparisons: Least Significant Difference (equivalent to no adjustments).

Univariate Tests

Dependent Variable: POSWB

| Sum of Squares | df | Mean Square | F | Sig. | Partial Eta Squared |
|----------------|----|-------------|---|------|---------------------|
|----------------|----|-------------|---|------|---------------------|

|          |           |      |        |       |      |      |
|----------|-----------|------|--------|-------|------|------|
| Contrast | 78.113    | 2    | 39.057 | 2.525 | .080 | .004 |
| Error    | 19010.188 | 1229 | 15.468 |       |      |      |

### Between-Subjects Factors

| N                         |   |     |
|---------------------------|---|-----|
| Percentile Group of MASKS | 1 | 444 |
|                           | 2 | 421 |
|                           | 3 | 375 |

### Descriptive Statistics

Dependent Variable: NEGWB

| Percentile Group of MASKS | Mean    | Std. Deviation | N    |
|---------------------------|---------|----------------|------|
| 1                         | 15.2027 | 8.11288        | 444  |
| 2                         | 19.8456 | 7.85205        | 421  |
| 3                         | 23.7973 | 8.77566        | 375  |
| Total                     | 19.3782 | 8.93938        | 1240 |

### Tests of Between-Subjects Effects

Dependent Variable: NEGWB

| Source          | Type III Sum of Squares | df | Mean Square | F       | Sig. | Partial Eta Squared |
|-----------------|-------------------------|----|-------------|---------|------|---------------------|
| Corrected Model | 53123.401 <sup>a</sup>  | 10 | 5312.340    | 142.278 | .000 | .537                |
| Intercept       | 684.047                 | 1  | 684.047     | 18.320  | .000 | .015                |
| NMASKS          | 5.105                   | 2  | 2.552       | .068    | .934 | .000                |

|                 |            |      |          |         |      |      |
|-----------------|------------|------|----------|---------|------|------|
| GENIO           | 2309.009   | 1    | 2309.009 | 61.841  | .000 | .048 |
| PSYCAP          | 2599.862   | 1    | 2599.862 | 69.631  | .000 | .054 |
| NEGCOP          | 2507.716   | 1    | 2507.716 | 67.163  | .000 | .052 |
| POSCOP          | 134.779    | 1    | 134.779  | 3.610   | .058 | .003 |
| NPANIC_C        | 4166.091   | 1    | 4166.091 | 111.578 | .000 | .083 |
| NCOVID_T        | 5.157      | 1    | 5.157    | .138    | .710 | .000 |
| NCOVID_I        | 4222.739   | 1    | 4222.739 | 113.095 | .000 | .084 |
| NCOVID_A        | 199.797    | 1    | 199.797  | 5.351   | .021 | .004 |
| Error           | 45888.211  | 1229 | 37.338   |         |      |      |
| Total           | 564651.000 | 1240 |          |         |      |      |
| Corrected Total | 99011.612  | 1239 |          |         |      |      |

a. R Squared = .537 (Adjusted R Squared = .533)

## Estimated Marginal Means

## Percentile Group of MASKS

### Estimates

Dependent Variable: NEGWB

| Percentile Group of MASKS | Mean                | Std. Error | 95% Confidence Interval |             |
|---------------------------|---------------------|------------|-------------------------|-------------|
|                           |                     |            | Lower Bound             | Upper Bound |
| 1                         | 19.359 <sup>a</sup> | .324       | 18.724                  | 19.994      |
| 2                         | 19.310 <sup>a</sup> | .299       | 18.724                  | 19.897      |
| 3                         | 19.478 <sup>a</sup> | .349       | 18.793                  | 20.163      |

a. Covariates appearing in the model are evaluated at the following values: GENIO = 8.1903, PSYCAP = 22.7258, NEG COP = 6.28, POS COP = 6.83, Percentile Group of PANIC\_COVID = 1.93, Percentile Group of COVID\_TIME = 2.00, Percentile Group of COVID\_IO = 1.98, Percentile Group of COVID\_ATT = 2.33.

### Pairwise Comparisons

Dependent Variable: NEGWB

| (I) Percentile Group of MASKS | (J) Percentile Group of MASKS | Mean Difference (I-J) | Std. Error | Sig. <sup>a</sup> |
|-------------------------------|-------------------------------|-----------------------|------------|-------------------|
| 1                             | 2                             | .049                  | .447       | .913              |
|                               | 3                             | -.119                 | .519       | .819              |
| 2                             | 1                             | -.049                 | .447       | .913              |
|                               | 3                             | -.168                 | .454       | .712              |
| 3                             | 1                             | .119                  | .519       | .819              |
|                               | 2                             | .168                  | .454       | .712              |

### Pairwise Comparisons

Dependent Variable: NEGWB

| (I) Percentile Group of MASKS | (J) Percentile Group of MASKS | 95% Confidence Interval for Difference <sup>a</sup> |             |
|-------------------------------|-------------------------------|-----------------------------------------------------|-------------|
|                               |                               | Lower Bound                                         | Upper Bound |
| 1                             | 2                             | -.828                                               | .925        |
|                               | 3                             | -1.137                                              | .899        |

|   |   |        |       |
|---|---|--------|-------|
| 2 | 1 | -.925  | .828  |
|   | 3 | -1.058 | .723  |
| 3 | 1 | -.899  | 1.137 |
|   | 2 | -.723  | 1.058 |

Based on estimated marginal means

a. Adjustment for multiple comparisons: Least Significant Difference (equivalent to no adjustments).

### Univariate Tests

Dependent Variable: NEGWB

|          | Sum of Squares | df   | Mean Square | F    | Sig. | Partial Eta Squared |
|----------|----------------|------|-------------|------|------|---------------------|
| Contrast | 5.105          | 2    | 2.552       | .068 | .934 | .000                |
| Error    | 45888.211      | 1229 | 37.338      |      |      |                     |

### Between-Subjects Factors

N

|                                   |   |     |
|-----------------------------------|---|-----|
| Percentile Group of<br>COVID_TIME | 1 | 413 |
|                                   | 2 | 418 |
|                                   | 3 | 409 |

### Descriptive Statistics

Dependent Variable: NEGWB

| Percentile Group of<br>COVID_TIME | Mean    | Std. Deviation | N   |
|-----------------------------------|---------|----------------|-----|
| 1                                 | 17.7070 | 8.32116        | 413 |

|       |         |         |      |
|-------|---------|---------|------|
| 2     | 19.6890 | 8.56707 | 418  |
| 3     | 20.7482 | 9.64023 | 409  |
| Total | 19.3782 | 8.93938 | 1240 |

### Tests of Between-Subjects Effects

Dependent Variable: NEGWB

| Source          | Type III Sum of Squares | df   | Mean Square | F       | Sig. | Partial Eta Squared |
|-----------------|-------------------------|------|-------------|---------|------|---------------------|
| Corrected Model | 53322.687 <sup>a</sup>  | 10   | 5332.269    | 143.434 | .000 | .539                |
| Intercept       | 679.486                 | 1    | 679.486     | 18.278  | .000 | .015                |
| NCOVID_T        | 207.692                 | 2    | 103.846     | 2.793   | .062 | .005                |
| GENIO           | 2391.010                | 1    | 2391.010    | 64.316  | .000 | .050                |
| PSYCAP          | 2549.947                | 1    | 2549.947    | 68.592  | .000 | .053                |
| NEGCOP          | 2523.983                | 1    | 2523.983    | 67.893  | .000 | .052                |
| POSCOP          | 124.100                 | 1    | 124.100     | 3.338   | .068 | .003                |
| NPANIC_C        | 4235.840                | 1    | 4235.840    | 113.941 | .000 | .085                |
| NCOVID_I        | 4207.262                | 1    | 4207.262    | 113.172 | .000 | .084                |
| NCOVID_A        | 173.958                 | 1    | 173.958     | 4.679   | .031 | .004                |
| NMASKS          | .506                    | 1    | .506        | .014    | .907 | .000                |
| Error           | 45688.925               | 1229 | 37.176      |         |      |                     |
| Total           | 564651.000              | 1240 |             |         |      |                     |
| Corrected Total | 99011.612               | 1239 |             |         |      |                     |

a. R Squared = .539 (Adjusted R Squared = .535)



## Estimated Marginal Means

### Percentile Group of COVID\_TIME

#### Estimates

Dependent Variable: NEGWB

| Percentile Group of<br>COVID_TIME | Mean                | Std. Error | 95% Confidence Interval |             |
|-----------------------------------|---------------------|------------|-------------------------|-------------|
|                                   |                     |            | Lower Bound             | Upper Bound |
| 1                                 | 19.005 <sup>a</sup> | .310       | 18.397                  | 19.614      |
| 2                                 | 19.949 <sup>a</sup> | .300       | 19.361                  | 20.537      |
| 3                                 | 19.171 <sup>a</sup> | .312       | 18.560                  | 19.783      |

a. Covariates appearing in the model are evaluated at the following values: GENIO = 8.1903, PSYCAP = 22.7258, NEG COP = 6.28, POS COP = 6.83, Percentile Group of PANIC\_COVID = 1.93, Percentile Group of COVID\_IO = 1.98, Percentile Group of COVID\_ATT = 2.33, Percentile Group of MASKS = 1.94.

#### Pairwise Comparisons

Dependent Variable: NEGWB

| (I) Percentile Group of<br>COVID_TIME | (J) Percentile Group of<br>COVID_TIME | Mean Difference<br>(I-J) | Std. Error | Sig. <sup>b</sup> |
|---------------------------------------|---------------------------------------|--------------------------|------------|-------------------|
| 1                                     | 2                                     | -.944 <sup>*</sup>       | .432       | .029              |
|                                       | 3                                     | -.166                    | .452       | .714              |

|   |   |       |      |      |
|---|---|-------|------|------|
| 2 | 1 | .944* | .432 | .029 |
|   | 3 | .778  | .433 | .073 |
| 3 | 1 | .166  | .452 | .714 |
|   | 2 | -.778 | .433 | .073 |

### Pairwise Comparisons

Dependent Variable: NEGWB

| (I) Percentile Group of<br>COVID_TIME | (J) Percentile Group of<br>COVID_TIME | 95% Confidence Interval for Difference <sup>b</sup> |             |
|---------------------------------------|---------------------------------------|-----------------------------------------------------|-------------|
|                                       |                                       | Lower Bound                                         | Upper Bound |
| 1                                     | 2                                     | -1.791                                              | -.096       |
|                                       | 3                                     | -1.053                                              | .722        |
| 2                                     | 1                                     | .096                                                | 1.791       |
|                                       | 3                                     | -.072                                               | 1.628       |
| 3                                     | 1                                     | -.722                                               | 1.053       |
|                                       | 2                                     | -1.628                                              | .072        |

Based on estimated marginal means

\*. The mean difference is significant at the .05 level.

b. Adjustment for multiple comparisons: Least Significant Difference (equivalent to no adjustments).

### Univariate Tests

Dependent Variable: NEGWB

|          | Sum of Squares | df   | Mean Square | F     | Sig. | Partial Eta Squared |
|----------|----------------|------|-------------|-------|------|---------------------|
| Contrast | 207.692        | 2    | 103.846     | 2.793 | .062 | .005                |
| Error    | 45688.925      | 1229 | 37.176      |       |      |                     |

## Between-Subjects Factors

|                                   | N |     |
|-----------------------------------|---|-----|
| Percentile Group of<br>COVID_TIME | 1 | 413 |
|                                   | 2 | 418 |
|                                   | 3 | 409 |

## Descriptive Statistics

Dependent Variable: POSWB

| Percentile Group of<br>COVID_TIME | Mean    | Std. Deviation | N    |
|-----------------------------------|---------|----------------|------|
| 1                                 | 20.1332 | 5.11510        | 413  |
| 2                                 | 19.5861 | 5.24219        | 418  |
| 3                                 | 20.1271 | 5.45332        | 409  |
| Total                             | 19.9468 | 5.27336        | 1240 |

## Tests of Between-Subjects Effects

Dependent Variable: POSWB

| Source          | Type III Sum of<br>Squares | df | Mean Square | F       | Sig. | Partial Eta<br>Squared |
|-----------------|----------------------------|----|-------------|---------|------|------------------------|
| Corrected Model | 15416.946 <sup>a</sup>     | 10 | 1541.695    | 99.527  | .000 | .447                   |
| Intercept       | 1561.856                   | 1  | 1561.856    | 100.828 | .000 | .076                   |
| NCOVID_T        | 64.899                     | 2  | 32.449      | 2.095   | .124 | .003                   |
| GENIO           | 59.782                     | 1  | 59.782      | 3.859   | .050 | .003                   |
| PSYCAP          | 4021.953                   | 1  | 4021.953    | 259.644 | .000 | .174                   |
| NEGCOP          | 245.105                    | 1  | 245.105     | 15.823  | .000 | .013                   |
| POSCOP          | 2240.004                   | 1  | 2240.004    | 144.607 | .000 | .105                   |

|                 |            |      |         |        |      |      |
|-----------------|------------|------|---------|--------|------|------|
| NPANIC_C        | 436.336    | 1    | 436.336 | 28.168 | .000 | .022 |
| NCOVID_I        | 226.807    | 1    | 226.807 | 14.642 | .000 | .012 |
| NCOVID_A        | 3.019      | 1    | 3.019   | .195   | .659 | .000 |
| NMASKS          | .168       | 1    | .168    | .011   | .917 | .000 |
| Error           | 19037.541  | 1229 | 15.490  |        |      |      |
| Total           | 527818.000 | 1240 |         |        |      |      |
| Corrected Total | 34454.487  | 1239 |         |        |      |      |

a. R Squared = .447 (Adjusted R Squared = .443)

## Estimated Marginal Means

## Percentile Group of COVID\_TIME

### Estimates

Dependent Variable: POSWB

| Percentile Group of<br>COVID_TIME | Mean                | Std. Error | 95% Confidence Interval |             |
|-----------------------------------|---------------------|------------|-------------------------|-------------|
|                                   |                     |            | Lower Bound             | Upper Bound |
| 1                                 | 19.952 <sup>a</sup> | .200       | 19.559                  | 20.345      |
| 2                                 | 19.662 <sup>a</sup> | .193       | 19.282                  | 20.041      |

|   |                     |      |        |        |
|---|---------------------|------|--------|--------|
| 3 | 20.233 <sup>a</sup> | .201 | 19.838 | 20.628 |
|---|---------------------|------|--------|--------|

a. Covariates appearing in the model are evaluated at the following values: GENIO = 8.1903, PSYCAP = 22.7258, NEGCOP = 6.28, POSCOP = 6.83, Percentile Group of PANIC\_COVID = 1.93, Percentile Group of COVID\_IO = 1.98, Percentile Group of COVID\_ATT = 2.33, Percentile Group of MASKS = 1.94.

### Pairwise Comparisons

Dependent Variable: POSWB

| (I) Percentile Group of<br>COVID_TIME | (J) Percentile Group of<br>COVID_TIME | Mean Difference<br>(I-J) | Std. Error | Sig. <sup>b</sup> |
|---------------------------------------|---------------------------------------|--------------------------|------------|-------------------|
| 1                                     | 2                                     | .291                     | .279       | .298              |
|                                       | 3                                     | -.281                    | .292       | .337              |
| 2                                     | 1                                     | -.291                    | .279       | .298              |
|                                       | 3                                     | -.571 <sup>*</sup>       | .280       | .041              |
| 3                                     | 1                                     | .281                     | .292       | .337              |
|                                       | 2                                     | .571 <sup>*</sup>        | .280       | .041              |

### Pairwise Comparisons

Dependent Variable: POSWB

| (I) Percentile Group of<br>COVID_TIME | (J) Percentile Group of<br>COVID_TIME | 95% Confidence Interval for Difference <sup>b</sup> |             |
|---------------------------------------|---------------------------------------|-----------------------------------------------------|-------------|
|                                       |                                       | Lower Bound                                         | Upper Bound |
| 1                                     | 2                                     | -.257                                               | .838        |
|                                       | 3                                     | -.854                                               | .292        |
| 2                                     | 1                                     | -.838                                               | .257        |
|                                       | 3                                     | -1.120                                              | -.023       |
| 3                                     | 1                                     | -.292                                               | .854        |
|                                       | 2                                     | .023                                                | 1.120       |

Based on estimated marginal means

\*. The mean difference is significant at the .05 level.

b. Adjustment for multiple comparisons: Least Significant Difference (equivalent to no adjustments).

### Univariate Tests

Dependent Variable: POSWB

|          | Sum of Squares | df   | Mean Square | F     | Sig. | Partial Eta Squared |
|----------|----------------|------|-------------|-------|------|---------------------|
| Contrast | 64.899         | 2    | 32.449      | 2.095 | .124 | .003                |
| Error    | 19037.541      | 1229 | 15.490      |       |      |                     |
